# Supplementary material for: Survey to identify research priorities for primary care in Scotland during and following the COVID-19 pandemic
Source: HighWire-hosted journal article supplement (doi:10.1136/bmjopen-2021-056817), 2022-05-01
Supplement: bmjopen-2021-056817supp001_data_supplement.pdf [file bmjopen-2021-056817supp001_data_supplement.pdf]

**Key partners**

Academy of Medical Royal Colleges and Faculties in Scotland (the Scottish Academy)  
Advanced Practice Physiotherapy Network  
Autism Network Scotland  
Association of Advanced Practice Educators UK  
BMA General Practitioners Committee Scotland  
Chair of Directors of Pharmacy, NHS Boards  
Chartered Society of Physiotherapy  
Chest Heart & Stroke  
Chief Nursing Officer  
COSLA - Convention of Scottish Local Authorities  
The Scottish Deep End Project  
Defence Primary Health Care Scotland  
Director of Postgraduate GP Education East  
Edinburgh Community Health Forum  
General Practice Nursing NHS Education Scotland  
Healthcare Improvement Scotland  
Health and Social Care Scotland (including Chief Officer Group and IJB Chairs & Vice Chairs Network)  
International Foundation for Integrated Care (IFIC)  
Mental Health Foundation  
National Academy for Social Prescribing  
NHS Board Chief Executives  
NHS 24 Stakeholder Engagement and Insight  
NHS National Services Scotland (NSS)  
NRS Primary Care PPI  
Penumbra -supporting mental health and wellbeing  
PHC Lead Nurse at SG/Primary Care General Practice Nursing  
Postgraduate Dean for Pharmacy NES  
Programme Director Nursing NES  
Public Health Scotland Primary Care Co-Cell Lead  
Public Health Scotland  
QNIS / Queen's Nursing Institute Scotland  
RCGP Scotland  
The Richmond Group of Charities, on behalf of the Taskforce on Multiple Conditions  
RNIB Scotland  
Royal College of General Practitioners  
Royal College of Occupational Therapists  
Royal College of Nursing Scotland  
Royal Pharmaceutical Society (Scotland)  
Scottish Ambulance Service, Medical Director  
Scottish Community Development Centre/Community Health Exchange  
Scottish Government - Division of Primary Care  
Scotland's House of Care Programme  
Scottish Physiotherapy Amputee Research Group (SPARG)  
Scottish Practice Pharmacist and Prescribing Advisors group  
Scottish Rural Health Partnership  
Scottish Rural Medicine Collaborative  
SIGN Scottish Intercollegiate Guidelines Network  
Sight Action

SPIRE clinical lead

The Association of Chartered Physiotherapists in Sports and Exercise Medicine

The Health and Social Care Alliance

The Society and College of Radiographers

Voluntary Health Scotland
