# Supplementary material for: Survey to identify research priorities for primary care in Scotland during and following the COVID-19 pandemic
Source: HighWire-hosted journal article supplement (doi:10.1136/bmjopen-2021-056817), 2022-05-01
Supplement: bmjopen-2021-056817supp002_data_supplement.pdf [file bmjopen-2021-056817supp002_data_supplement.pdf]

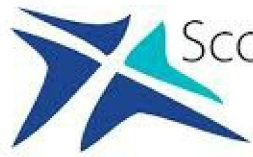

Scottish School of Primary Care

# Scotland Primary Care Research Prioritisation Exercise survey

---

**We are asking you to complete a short survey (3 questions that will take about 5 minutes to complete) that will ultimately lead to a Top Ten list of priorities for primary care research in Scotland.** Before completing the survey please find some information about the study. Please only complete the survey if you live or work in Scotland. **Consent - Sorry you cannot proceed if you do not consent to take part.**

\* *Required*

**Before completing the survey please find some information about the study.**

## Scotland Primary Care Research Prioritisation Exercise

Our goal is to provide a clear direction for future primary care research so that it benefits the lives of individuals and families, and increases the amount of funding for the most important primary care research. We want to see research made even better with your input.

### Purpose of the project

High-quality primary care is underpinned by high-quality research.

The disease COVID-19 that is caused by a new strain of coronavirus is likely to re-direct research priorities and shift research agendas in primary care.

The aim of this project is to reach a consensus for primary care research priorities in Scotland where uncertainties remain and set a research direction that will be relevant for patients, carers and generalist healthcare professionals for the next 5 years.

It is designed to strengthen future evidence about primary care to improve health outcomes.

### **Who should do the survey?**

Anyone living in Scotland who uses primary care services (patients and carers) or who are healthcare professionals working in Scotland will be eligible to participate in the identification and prioritisation of uncertainties.

### **Who is leading the project?**

The project is led by the Scottish School of Primary Care. Our **key partners** are:

Academy of Medical Royal Colleges and Faculties in Scotland (the Scottish Academy)

Advanced Practice Physiotherapy Network

Autism Network Scotland

Association of Advanced Practice Educators UK

BMA General Practitioners Committee Scotland

Chair of Directors of Pharmacy

Chartered Society of Physiotherapy

Chest Heart & Stroke

Chief Nursing Officer

Community Pharmacy Scotland

COSLA – Convention of Scottish Local Authorities

Director of Postgraduate GP Education

Defence Primary Health Care Scotland

Edinburgh Community Health Forum

General Practice Nursing – NHS Education Scotland

Healthcare Improvement Scotland

Health and Social Care Partnerships

Health and Social Care Scotland (including Chief Officer Group and The IJB Chairs & Vice Chairs Network)

International Foundation for Integrated Care (IFIC)

Mental Health Foundation

National Academy for Social Prescribing

NHS Chief Executives Board

NHS National Services Scotland (NSS)

NRS Primary Care Network PPI group

NRS Primary Care Network

Penumbra -supporting mental health and wellbeing

PHC Lead Nurse at SG/Primary Care General Practice Nursing

Postgraduate Dean for Pharmacy NES

Programme Director Nursing NES

Public Health Scotland Primary Care Co-Cell Lead

Public Health Scotland

Queen's Nursing Institute Scotland

RNIB Scotland

Royal College of General Practitioners

Royal College of Nursing Scotland

Royal College of Occupational Therapists

Royal Pharmaceutical Society (Scotland)

Scottish Ambulance Service

Scottish Community Development Centre / Community Health Exchange

Scottish Government - Division of Primary Care

Scotland's House of Care Programme

Scottish Physiotherapy Amputee Research Group (SPARG)

Scottish Practice Pharmacist and Prescribing Advisors group

Scottish Rural Medicine Collaborative

Scottish Rural Health Partnership

SIGN – Scottish Intercollegiate Guidelines Network

Sight Action

SPIRE clinical lead

The Association of Chartered Physiotherapists in Sports and Exercise Medicine

The Health and Social Care Alliance

The Richmond Group of Charities, on behalf of the Taskforce on Multiple Conditions

The Scottish Deep End Project

The Society and College of Radiographers

Voluntary Health Scotland

### **Who is funding the project?**

The Scottish Government financially supports the Scottish School of Primary Care.

### **What about confidentiality?**

You can respond anonymously to this survey – you do not have to give your name or contact details. If you are a healthcare professional we will ask you what your occupation is.

### **Who do I contact for further information about the study?**

Prof Gill Hubbard is leading this project. She is a co-deputy director of the Scottish School of Primary Care.

She can be contacted at the following address or by email:

Prof Gill Hubbard, Department of Nursing, University of the Highlands and Islands, Highland Campus, Centre for Health Science, Old Perth Road, Inverness, IV2 3JH.

Email: [gill.hubbard@uhi.ac.uk](mailto:gill.hubbard@uhi.ac.uk)

### **What if I wish to complain about the study?**

You can submit a written complaint about the study to: Prof Annetta Smith, Department of Nursing, University of the Highlands and Islands, Highland Campus, Centre for Health Science, Old Perth Road, Inverness, IV2 3JH.

Or you can contact her by telephone on: 01851 708250

Or you can email her at: [Annetta.Smith@uhi.ac.uk](mailto:Annetta.Smith@uhi.ac.uk)

### **What will happen with the results?**

Outputs will include academic papers, lay reports, infographics and social media feeds.

The project results could be used by funding bodies and decision-makers to influence the types of studies that are conducted by an array of researchers who are typically engaged in primary care research including general practitioners, nurses, pharmacists, psychologists, sociologists, anthropologists, statisticians, health economists, and health services researchers.

## Scotland Primary Care Research Prioritisation Exercise survey

Primary care is provided by generalist health professionals, working together in multidisciplinary and multiagency networks across sectors, with access to the expertise of specialist colleagues. All primary care professionals work flexibly using local knowledge, clinical expertise and a continuously supportive and enabling relationship with the person to make shared decisions about their care and help them to manage their own health and wellbeing.

### About you: Where do you live most of the time?

**Are you an unpaid carer?** An unpaid carer is defined as someone who is caring but does not have a contract or doing it as voluntary work.

Please select exactly 1 answer(s).

- Yes
- No

### Do you consider yourself to have a long-term condition?

Please select exactly 1 answer(s).

- Yes
- No

**Do you work in health and / or social care?**

## Which sector do you work in?

### What sector do you work in? (please tick all that apply)

- Community Care
- Government (local or national)
- Primary Care
- Secondary Care
- Third Sector
- University
- Other

If you selected Other, please specify:

### What is your main profession? (please select one)

- Allied health profession regulated by Health & Care Profession Council (Please write it down)
- Dentistry regulated by General Dental Council
- Medicine regulated by General Medical Council
- Nursing or Midwifery regulated by Nursing & Midwifery Council
- Pharmacy regulated by General Pharmaceutical Council
- Social work regulated by Scottish Social Services Council
- Other

If you selected 'Allied Health Profession' or 'Other', please specify:



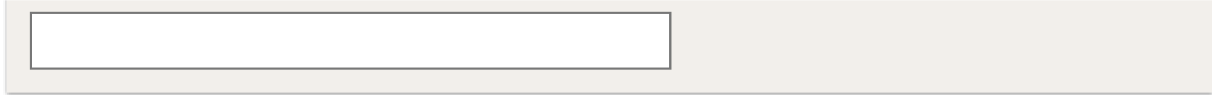

## Research to Improve Primary Care

**What topics, issues and concerns do you think are important to research to improve primary care for the next 5 years?** Please suggest up to three (in any order)

Suggestion 1.

Suggestion 2.

Suggestion 3.

Would you be willing to be involved in the next stage where you will be asked to rank a list of research questions in order of priority then please provide your email address:

Please provide email address:

## What happens next..

***You have been directed here if you did not consent to take part in the survey OR you have now completed the survey.***

### **What will happen with the results?**

Outputs will include academic papers, lay reports, infographics and social media feeds.

The project results could be used by funding bodies and decision-makers to influence the types of studies that are conducted by an array of researchers who are typically engaged in primary care research including general practitioners, nurses, pharmacists, psychologists, sociologists, anthropologists, statisticians, health economists, and health services researchers.

## Final page

Thank you for taking part in the survey.

---

## Key for selection options

**1 - We are asking you to complete a short survey (3 questions that will take about 5 minutes to complete) that will ultimately lead to a Top Ten list of priorities for primary care research in Scotland. Before completing the survey please find some information about the study. Please only complete the survey if you live or work in Scotland. Consent - Sorry you cannot proceed if you do not consent to take part.**

I consent to take part in the survey

I do not consent to take part

**2 - About you: Where do you live most of the time?**

Scotland

Not in Scotland

**5 - Do you work in health and / or social care?**

Yes

No

**9 - Would you be willing to be involved in the next stage where you will be asked to rank a list of research questions in order of priority then please provide your email address:**

Yes

No

---
