# Supplementary material for: Survey to identify research priorities for primary care in Scotland during and following the COVID-19 pandemic
Source: HighWire-hosted journal article supplement (doi:10.1136/bmjopen-2021-056817), 2022-05-01
Supplement: bmjopen-2021-056817supp003_data_supplement.pdf [file bmjopen-2021-056817supp003_data_supplement.pdf]

**Theme 1 'Disease and illness' sub-theme 'mental health' examples**

| Topics                    | Suggestion examples                                                                                                                                                                                                                                                                                                                                                                                                                                                                                                                                         |
|---------------------------|-------------------------------------------------------------------------------------------------------------------------------------------------------------------------------------------------------------------------------------------------------------------------------------------------------------------------------------------------------------------------------------------------------------------------------------------------------------------------------------------------------------------------------------------------------------|
| Children and young people | <ul style="list-style-type: none"> <li>• Mental health services in children and adolescents</li> <li>• How can primary and secondary care better work together to care for children and young people with mental disorder, ranging from ADHD to anorexia nervosa.</li> <li>• Improving mental health services. There has been a huge increase in maternal mental health and child and adolescent mental health issues since the Covid 19 pandemic.</li> </ul>                                                                                               |
| Management                | <ul style="list-style-type: none"> <li>• Development of mental health support for those with mental wellbeing difficulties presenting to primary care and being managed in primary care- support worker for self-help and counselling etc</li> <li>• Proactive management of anxiety and mental health - aiming to audit and address this growing unmet need within primary care.</li> <li>• Management plans. Social, spiritual, mental health, where and how you would like to die.</li> </ul>                                                            |
| Access                    | <ul style="list-style-type: none"> <li>• Improved access to mental well-being support</li> <li>• Mental health provision</li> <li>• Availability of mental health services for adults</li> </ul>                                                                                                                                                                                                                                                                                                                                                            |
| Covid-19                  | <ul style="list-style-type: none"> <li>• The impact of isolation to people's mental wellbeing during Covid</li> <li>• Deterioration in the mental health of people with Autism and learning difficulties during Covid</li> </ul>                                                                                                                                                                                                                                                                                                                            |
| MDT                       | <ul style="list-style-type: none"> <li>• Issue - lack of AHP particularly OT in primary care. Patients with mental health problems or complex comorbidity who do not meet the criteria for secondary care services cannot access OT services until they become very unwell. Goes against early intervention.</li> <li>• Why there are not more funded training places for people to deliver psychological interventions, i.e. psychologists, when demand greatly outweighs number of spaces currently available, and waiting lists are enormous.</li> </ul> |
| Remote consultations      | <ul style="list-style-type: none"> <li>• Mental health services, particularly remote access</li> </ul>                                                                                                                                                                                                                                                                                                                                                                                                                                                      |
| Self-care                 | <ul style="list-style-type: none"> <li>• Eating well for your mental health</li> </ul>                                                                                                                                                                                                                                                                                                                                                                                                                                                                      |
| Early intervention        | <ul style="list-style-type: none"> <li>• Early access to mental health services in the community</li> </ul>                                                                                                                                                                                                                                                                                                                                                                                                                                                 |
| Medication                | <ul style="list-style-type: none"> <li>• Inappropriately long durations of antidepressants</li> </ul>                                                                                                                                                                                                                                                                                                                                                                                                                                                       |
| Carers                    | <ul style="list-style-type: none"> <li>• The impact on the mental health of unpaid carers. Who is caring for the carers? What percentage of carers die before the cared for?</li> </ul>                                                                                                                                                                                                                                                                                                                                                                     |
| Equity                    | <ul style="list-style-type: none"> <li>• The effect on the mental health of people who rely on charities to do their weekly shop</li> </ul>                                                                                                                                                                                                                                                                                                                                                                                                                 |

**Theme 1 'Disease and illness' sub-theme 'Covid-19' examples**

| Topics           | Suggestion examples                                                                                                                                                                                                                                                                                                                                                                                                                            |
|------------------|------------------------------------------------------------------------------------------------------------------------------------------------------------------------------------------------------------------------------------------------------------------------------------------------------------------------------------------------------------------------------------------------------------------------------------------------|
| Management       | <ul style="list-style-type: none"><li>• Post Covid what the primary care consulting model will look like and how patients will be triaged in the future with potential infections</li><li>• Long Covid and its issues for patients- what should services look like to support these patients?</li><li>• Interventions in the community for post-Covid care IT - suggested assessments or interventions especially managing risk etc.</li></ul> |
| Lived experience | <ul style="list-style-type: none"><li>• Living with long Covid'</li><li>• Post Covid symptoms – long-term recovery and support</li></ul>                                                                                                                                                                                                                                                                                                       |
| Mental health    | <ul style="list-style-type: none"><li>• Long term effects of Covid-19 on anxiety, depression, especially in young people</li><li>• Mental health - impact of Covid on patients</li></ul>                                                                                                                                                                                                                                                       |
| Vaccination      | <ul style="list-style-type: none"><li>• Long term side effects of Covid immunisation and the overall effect – how often will we need a vaccine and what's the longevity of the antibodies?</li></ul>                                                                                                                                                                                                                                           |

**Theme 1 'Disease and illness' sub-theme 'long-term conditions' examples**

| Topics               | Suggestion examples                                                                                                                                                                                                                                                                                                                                            |
|----------------------|----------------------------------------------------------------------------------------------------------------------------------------------------------------------------------------------------------------------------------------------------------------------------------------------------------------------------------------------------------------|
| Management           | <ul style="list-style-type: none"><li>• Management of long-term conditions</li><li>• Disparity over how we deliver long term condition management and how that affects outcomes</li><li>• Long term condition monitoring, does it improve morbidity and mortality? If so, for which conditions and what is optimum review interval and requirements'</li></ul> |
| Self-care            | <ul style="list-style-type: none"><li>• Self-care of long-term conditions</li><li>• Supporting patients living with long term conditions to take control of them with support from health care professionals</li></ul>                                                                                                                                         |
| Remote consultations | <ul style="list-style-type: none"><li>• Remote consultant in long term condition management</li><li>• Use of remote consultation on management of long-term chronic conditions as this group have a high DNA rate for face to face appointments</li></ul>                                                                                                      |
| Prevention           | <ul style="list-style-type: none"><li>• Primary prevention of long-term conditions. What would really work in the real world</li></ul>                                                                                                                                                                                                                         |

**Theme 1 'Disease and illness' sub-theme 'obesity' examples**

| Topics     | Examples                                                                                                                                                                                        |
|------------|-------------------------------------------------------------------------------------------------------------------------------------------------------------------------------------------------|
| Prevention | <ul style="list-style-type: none"><li>• Better resources and treatments for prevention of obesity, once a patient has gained significant weight very difficult to remove and sustain.</li></ul> |
| Management | <ul style="list-style-type: none"><li>• Weight management/exercise</li><li>• Obesity management strategies that are accessible for all</li></ul>                                                |

**Theme 1 'Disease and illness' sub-theme 'diabetes' examples**

| Topics           | Examples                                                                                                                                                                                                                                          |
|------------------|---------------------------------------------------------------------------------------------------------------------------------------------------------------------------------------------------------------------------------------------------|
| Prevention       | <ul style="list-style-type: none"><li>• Diabetes and Obesity at all ages. More needs to be done about healthy eating and life style</li><li>• Type 2 Diabetes - lifestyle management &amp; prevention of disease or disease progression</li></ul> |
| Medication       | <ul style="list-style-type: none"><li>• Cost benefits of GLP-1 receptor activators</li><li>• Effects of lifestyle v drugs for Diabetes and CV disease and how to effectively deliver these</li></ul>                                              |
| Lived experience | <ul style="list-style-type: none"><li>• Pre-diabetes and progression to type 2 diabetes and the patients experience and what they feel could have been done differently</li></ul>                                                                 |

**Theme 1 'Disease and illness' sub-theme 'dementia' examples**

| Topics             | Examples                                                                                                                                                                                                                                                                                  |
|--------------------|-------------------------------------------------------------------------------------------------------------------------------------------------------------------------------------------------------------------------------------------------------------------------------------------|
| Management         | <ul style="list-style-type: none"><li>• Dementia service / resource</li><li>• Alternatives to 24hr large group residential settings vs group houses or entire dementia communities to allow safeguarding and independence</li></ul>                                                       |
| Lived experience   | <ul style="list-style-type: none"><li>• Experience of persons with Dementia / L Disability in Inpatient acute care</li></ul>                                                                                                                                                              |
| Early intervention | <ul style="list-style-type: none"><li>• Implementation of OT services for early intervention for people with a dementia diagnosis</li><li>• More timely diagnosis and access to dementia support. Dementia assessment and treatment to be separate from Mental Health services.</li></ul> |
| Carers             | <ul style="list-style-type: none"><li>• Support for carers</li></ul>                                                                                                                                                                                                                      |

**Theme 1 'Disease and illness' sub-theme 'frailty' examples**

| Topics             | Examples                                                                                                                                                                                                                             |
|--------------------|--------------------------------------------------------------------------------------------------------------------------------------------------------------------------------------------------------------------------------------|
| Management         | <ul style="list-style-type: none"><li>• With an ageing population, a continued long-term strategy to address falls and fragility from cradle to grave</li><li>• Approaches to frailty and last-years-of-life trajectories.</li></ul> |
| Mental health      | <ul style="list-style-type: none"><li>• Impact of COVID/Isolation on mental health within the frail elderly population</li></ul>                                                                                                     |
| Early intervention | <ul style="list-style-type: none"><li>• Early intervention for prevention in frailty</li></ul>                                                                                                                                       |
| Lived experience   | <ul style="list-style-type: none"><li>• Frailty of people living in own homes</li></ul>                                                                                                                                              |

**Theme 1 'Disease and illness' sub-theme 'addiction' examples**

| Topics             | Examples                                                                                                                                                                                                      |
|--------------------|---------------------------------------------------------------------------------------------------------------------------------------------------------------------------------------------------------------|
| Management         | <ul style="list-style-type: none"><li>• The role of Occupational Therapy within addiction, recovery and treatment teams</li></ul>                                                                             |
| Medication         | <ul style="list-style-type: none"><li>• Supporting people with alcohol and drug issues and polypharmacy</li></ul>                                                                                             |
| Lived experience   | <ul style="list-style-type: none"><li>• Recovery from Addictions</li></ul>                                                                                                                                    |
| Mental health      | <ul style="list-style-type: none"><li>• Mental health services including drug and alcohol and children's services.</li></ul>                                                                                  |
| Early intervention | <ul style="list-style-type: none"><li>• The effect of early intervention (beyond Brief Intervention) on those identified with harmful drinking levels - preventing progress onto Hazardous drinking</li></ul> |



**Theme 2 'Access' sub-theme 'availability and presence of services' examples**

| Topics              | Examples                                                                                                                                                                                                                                                                                                                                                                                                              |
|---------------------|-----------------------------------------------------------------------------------------------------------------------------------------------------------------------------------------------------------------------------------------------------------------------------------------------------------------------------------------------------------------------------------------------------------------------|
| Provision           | <ul style="list-style-type: none"><li>• Primary care access to psychological therapies and counselling<br/>Access to primary care services</li><li>• How to build in sustainable service developments, particularly that can become community assets</li><li>• Management of mental health and service availability</li></ul>                                                                                         |
| Care closer to home | <ul style="list-style-type: none"><li>• Access to services in the community/ more funding for community-based hubs</li><li>• Transfer of services to primary care so that care can be delivered closer to patients' homes, do centralised services such as care and treatment services improve patient care?</li><li>• Impacts on rural communities in accessing healthcare with redesign to hub healthcare</li></ul> |

**Theme 2 'Access' sub-theme 'utilisation and service barriers' examples**

| Topics                                 | Examples                                                                                                                                                                                                                                                                                                                                                                   |
|----------------------------------------|----------------------------------------------------------------------------------------------------------------------------------------------------------------------------------------------------------------------------------------------------------------------------------------------------------------------------------------------------------------------------|
| Accessing healthcare professionals     | <ul style="list-style-type: none"> <li>• Access to nurse and GP appointments</li> <li>• Easy access for patients to GPs and other health professionals. Some may find it difficult to get appointments</li> <li>• Easier access to Medical Professionals' 'Patient access to the wider multidisciplinary team and breaking down barriers that are stopping this</li> </ul> |
| Organisational barriers                | <ul style="list-style-type: none"> <li>• Patient access to GP face to face appointments</li> <li>• How to improve harder to reach patients accessing health services</li> <li>• Far better transport access to hospitals, either public or NHS</li> </ul>                                                                                                                  |
| Waiting times                          | <ul style="list-style-type: none"> <li>• Waiting times</li> <li>• Quicker access to primary care input to prevent escalation to secondary care services</li> <li>• What impact does a 2 year waiting list for psychological therapy have on mental health patients?</li> <li>• Impact of reduced time with the GP and longer waiting times on health outcomes</li> </ul>   |
| Patient understanding and expectations | <ul style="list-style-type: none"> <li>• 'First contact physio service- need to improve patient understanding</li> <li>• Access to services - how to reduce inappropriate demand to improve available provision</li> </ul>                                                                                                                                                 |
| Out of hours                           | <ul style="list-style-type: none"> <li>• 7 day access to GP surgeries</li> </ul>                                                                                                                                                                                                                                                                                           |
| Accessing during pandemic              | <ul style="list-style-type: none"> <li>• Impact of access challenges in immediate phase 1 of Covid on diagnosis of chronic conditions e.g. depression</li> </ul>                                                                                                                                                                                                           |
| Health literacy                        | <ul style="list-style-type: none"> <li>• Addressing health literacy to improve outcomes</li> </ul>                                                                                                                                                                                                                                                                         |

**Theme 2 'Access' sub-theme 'relevance and effectiveness of services' examples**

| Topics        | Examples                                                                                                                                                                                                                                                                                                                                                                                                                                                      |
|---------------|---------------------------------------------------------------------------------------------------------------------------------------------------------------------------------------------------------------------------------------------------------------------------------------------------------------------------------------------------------------------------------------------------------------------------------------------------------------|
| Right service | <ul style="list-style-type: none"><li>• How mental health services are meeting the needs of patients within primary care</li><li>• How Primary care become more responsive to the needs of the community</li><li>• Effects of 'long Covid' on patients and access to effective treatment</li><li>• Evaluation of impact of changes to patient engagement with GP practices (including different models, like care navigation, GP first triaging etc</li></ul> |
| Right time    | <ul style="list-style-type: none"><li>• Access to early intervention on Mental Health concerns before they worsen</li><li>• Triage to improve access to the right the person at the right time</li><li>• How can we improve care for the housebound (who now often end up with reactive care from random professionals</li></ul>                                                                                                                              |

**Theme 2 'Access' sub-theme 'equity' examples**

| Topics         | Examples                                                                                                                                                                                                                                                                                                                                        |
|----------------|-------------------------------------------------------------------------------------------------------------------------------------------------------------------------------------------------------------------------------------------------------------------------------------------------------------------------------------------------|
| Access for all | <ul style="list-style-type: none"><li>• Ensuring that services are accessible, acceptable, available and high quality, in line with a rights-based approach to ensuring that services support our shared right to the highest attainable standard of health</li><li>• Unwarranted variation in care and medicines use across Scotland</li></ul> |
| Rurality       | <ul style="list-style-type: none"><li>• The numbers of people living rurally, with no access to a car and miles from the nearest GP practice and the effect on their mental and physical health</li></ul>                                                                                                                                       |
| Deprivation    | <ul style="list-style-type: none"><li>• Communication poverty to improve accessibility, participation and citizenship</li></ul>                                                                                                                                                                                                                 |

**Theme 3 'workforce' sub-theme examples**

| Sub-theme                 | Examples                                                                                                                                                                                                                                          |
|---------------------------|---------------------------------------------------------------------------------------------------------------------------------------------------------------------------------------------------------------------------------------------------|
| Recruitment and retention | <ul style="list-style-type: none"><li>• Encourage GPs in primary care</li><li>• Staff shortages in district nursing</li></ul>                                                                                                                     |
| Training and development  | <ul style="list-style-type: none"><li>• Sharing of best practice and protocols for routine work</li><li>• Sensory awareness and communication training for all primary care service staff</li></ul>                                               |
| Workload                  | <ul style="list-style-type: none"><li>• Looking at pay/ employment rights/ annual leave of all practice nurses across Scotland and standardising it</li><li>• The patient contact workload of GPs and impact on GP workforce and safety</li></ul> |
| Mental health             | <ul style="list-style-type: none"><li>• Supporting staff's wellbeing when working from home</li><li>• Burnout in the primary care workforce</li></ul>                                                                                             |
| GMS contract              | <ul style="list-style-type: none"><li>• Impact of the 2018 GP contract</li></ul>                                                                                                                                                                  |

**Theme 4 'multi-disciplinary team' examples**

| Theme | Examples                                                                                                                                                                                                                                                                                                                                                                                                                                                        |
|-------|-----------------------------------------------------------------------------------------------------------------------------------------------------------------------------------------------------------------------------------------------------------------------------------------------------------------------------------------------------------------------------------------------------------------------------------------------------------------|
| MDT   | <ul style="list-style-type: none"><li>• Added value of MDT in primary care?</li><li>• Primary care is becoming more of an MDT; patient perspectives on this?</li><li>• Effectiveness of nurse-led clinics</li><li>• Unique contribution of occupational therapy service provision in early intervention for prevention model of service delivery within MDT in primary care setting</li><li>• What is the role of the General Practice Nurse in 2030?</li></ul> |

**Theme 5 'Integration' sub-theme examples**

| Sub-theme                              | Examples                                                                                                                                                                                                                                                                                                                                                                           |
|----------------------------------------|------------------------------------------------------------------------------------------------------------------------------------------------------------------------------------------------------------------------------------------------------------------------------------------------------------------------------------------------------------------------------------|
| Multi-agency working and collaboration | <ul style="list-style-type: none"><li>• Links with primary care and community rehabilitation teams</li><li>• Impact of care at home through multi-agencies versus controlled agency commitment</li><li>• Prioritisation in the context of health and social care need (not just health need)</li><li>• Inclusive Communication Strategy across all primary care services</li></ul> |
| Continuity of care                     | <ul style="list-style-type: none"><li>• How Primary care can ensure continuity of care between themselves and the patient</li><li>• Tools to measure continuity of care reliably</li></ul>                                                                                                                                                                                         |
| Social prescribing                     | <ul style="list-style-type: none"><li>• How to ensure the majority GPs to actively promote and utilise social prescribing</li><li>• The extent to which community link workers in primary care practices are making measurable differences to patients' wellbeing and to health inequalities</li></ul>                                                                             |

**Theme 6 'health inequalities' examples**

| Theme               | Examples                                                                                                                                                      |
|---------------------|---------------------------------------------------------------------------------------------------------------------------------------------------------------|
| Health inequalities | <ul style="list-style-type: none"><li>• What measurable impact will primary care make on health inequalities across Scotland over the next 5 years?</li></ul> |
| Deprivation         | <ul style="list-style-type: none"><li>• Poverty and the impact this has on health and wellbeing</li></ul>                                                     |
